# Supplementary material
Source: ML conference proceedings conference paper supplement (https://openaccess.thecvf.com/content/ICCV2023/html/Hong_AesPA-Net_Aesthetic_Pattern-Aware_ICCV_2023_paper.html)
Supplement: Supplementary file 1 [file Hong_AesPA-Net_Aesthetic_Pattern-Aware_ICCV_2023_supplemental.pdf]

**(Supplementary Material)**  
**AesPA-Net: Aesthetic Pattern-Aware Style Transfer Networks**

Kibeom Hong<sup>1,3,4</sup>   Seogkyu Jeon<sup>1</sup>   Junsoo Lee<sup>4</sup>   Namhyuk Ahn<sup>4</sup>   Kunhee Kim<sup>2,4</sup>  
Pilhyeon Lee<sup>1</sup>   Daesik Kim<sup>4</sup>   Youngjung Uh<sup>1</sup>   Hyeran Byun<sup>1\*</sup>  
<sup>1</sup>Yonsei University   <sup>2</sup>KAIST AI   <sup>3</sup>SwatchOn   <sup>4</sup>NAVER WEBTOON AI

**A. Additional qualitative results**

We provide additional qualitative results with zoomed patches for better comparisons with previous state-of-the-arts [6, 5, 8, 4, 7, 1, 3]. As shown in Fig. 2, our AesPA-Net outperform previous works. Moreover, we present the further qualitative comparisons with other recent AST methods such as CAST [12], AesUST [10] and StyleFormer [11], as well as patch-swapping based methods including AvatarNet [9] and style-swap [2] in Fig. 3.

In addition, we conduct artistic style transfer on high-resolution images (4752×3168) which are shown in Fig. 4. Also in Fig. 5, we depict the results of our stylization transformer with the improved computation efficiency by replacing WCT [6] with AdaIN [5].

Lastly, we provide additional qualitative comparison results for demonstrating the effectiveness of improved attention module in Fig. 6.

**B. Analysis of probability  $p$**

In this section, we conduct ablation studies to verify the effect of probability  $p$  on the proposed pattern repeatability  $\alpha_{style}$  by varying the value from 0.01 to 1.0. As shown in Fig. 1,  $\alpha_{style}$  could capture the rhythm of pattern in each image even with few patch samples. Note that we set the probability  $p$  as 0.1 throughout the experiments for efficient calculation.

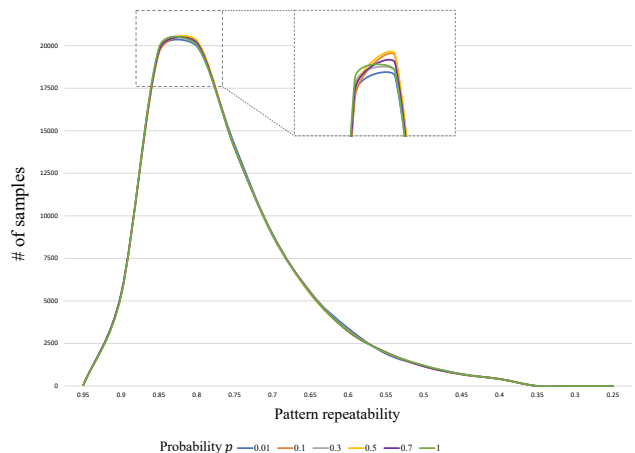

Figure 1. Ablation study of probability  $p$  for calculating the proposed pattern repeatability  $\alpha_{style}$ .

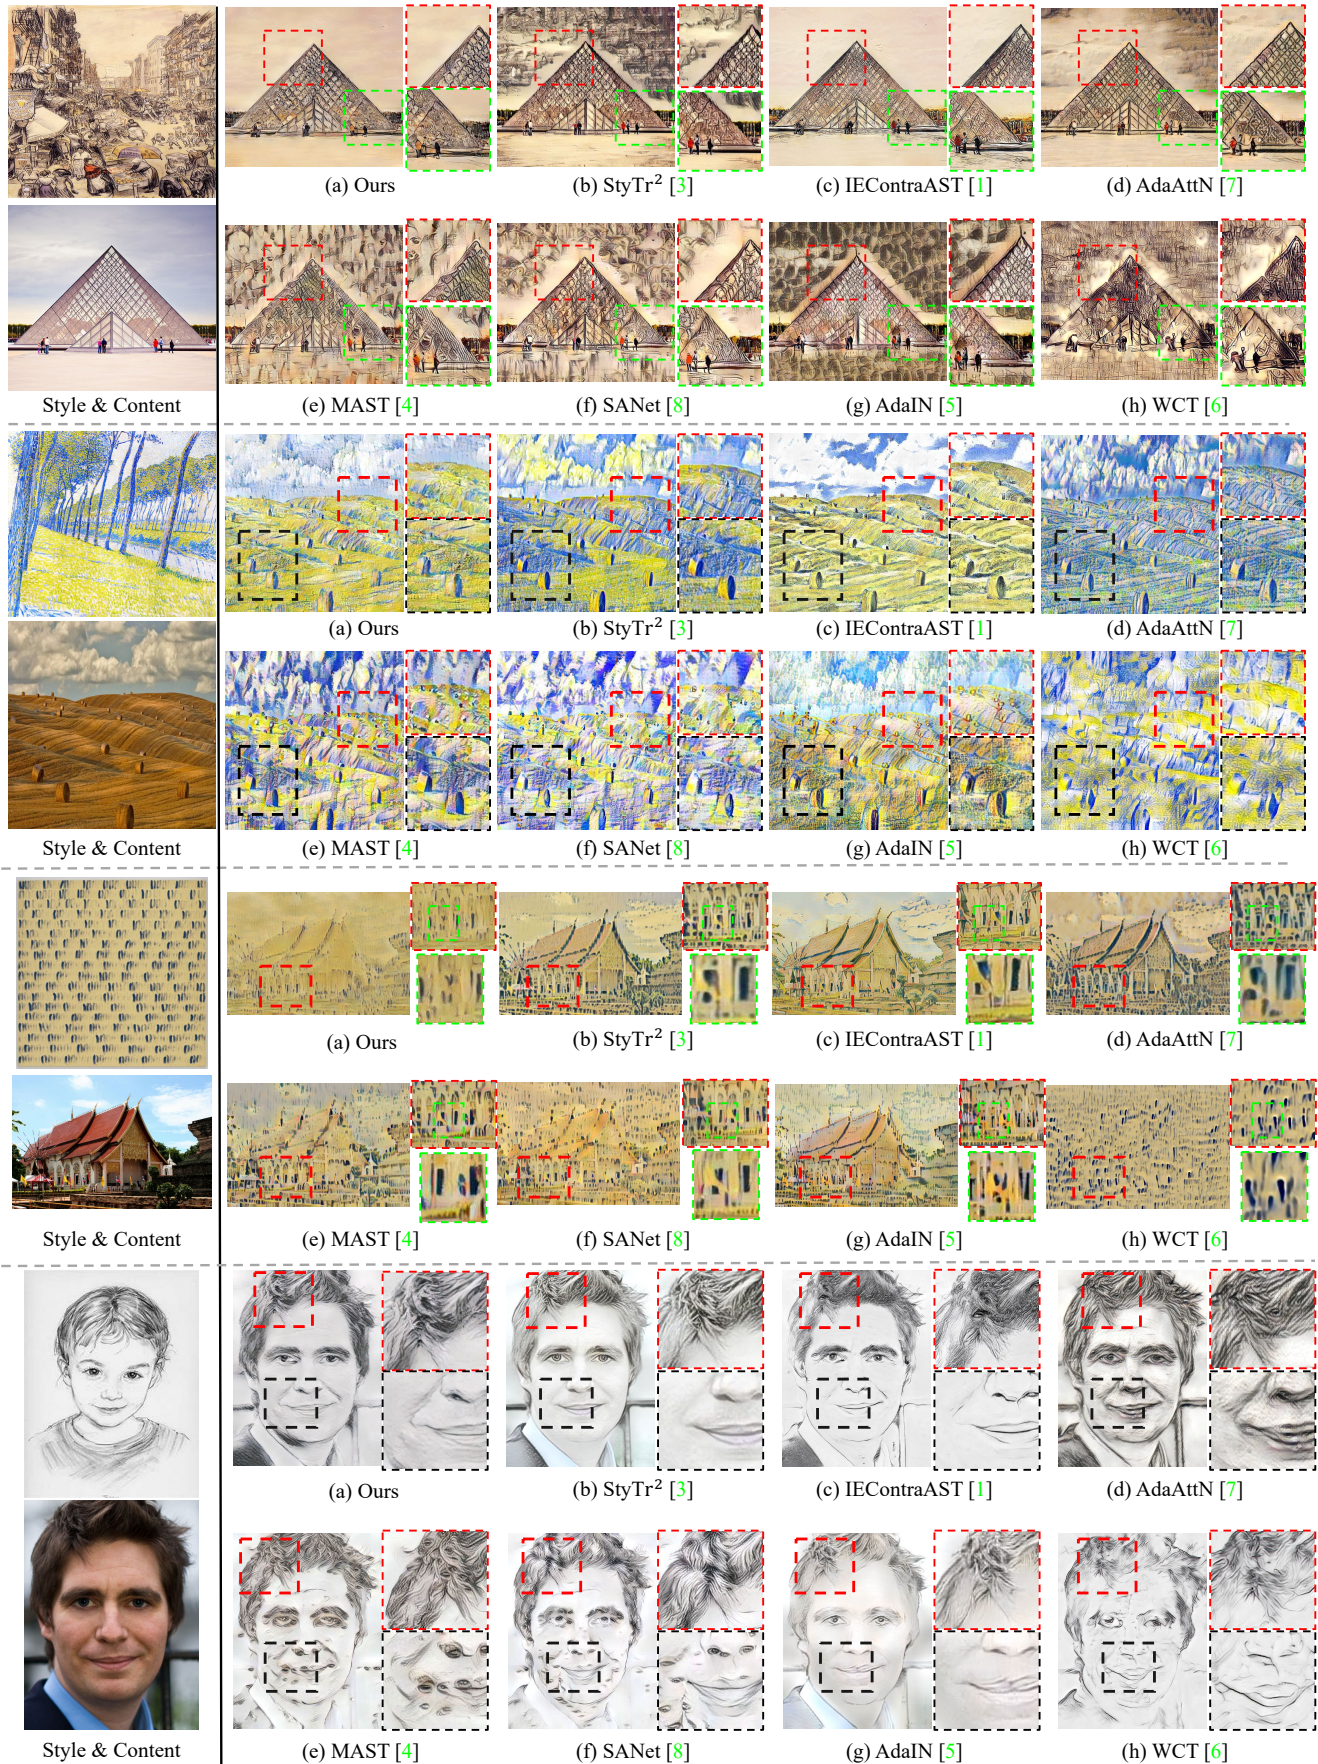

Figure 2. Qualitative comparisons with state-of-the-art AST methods.

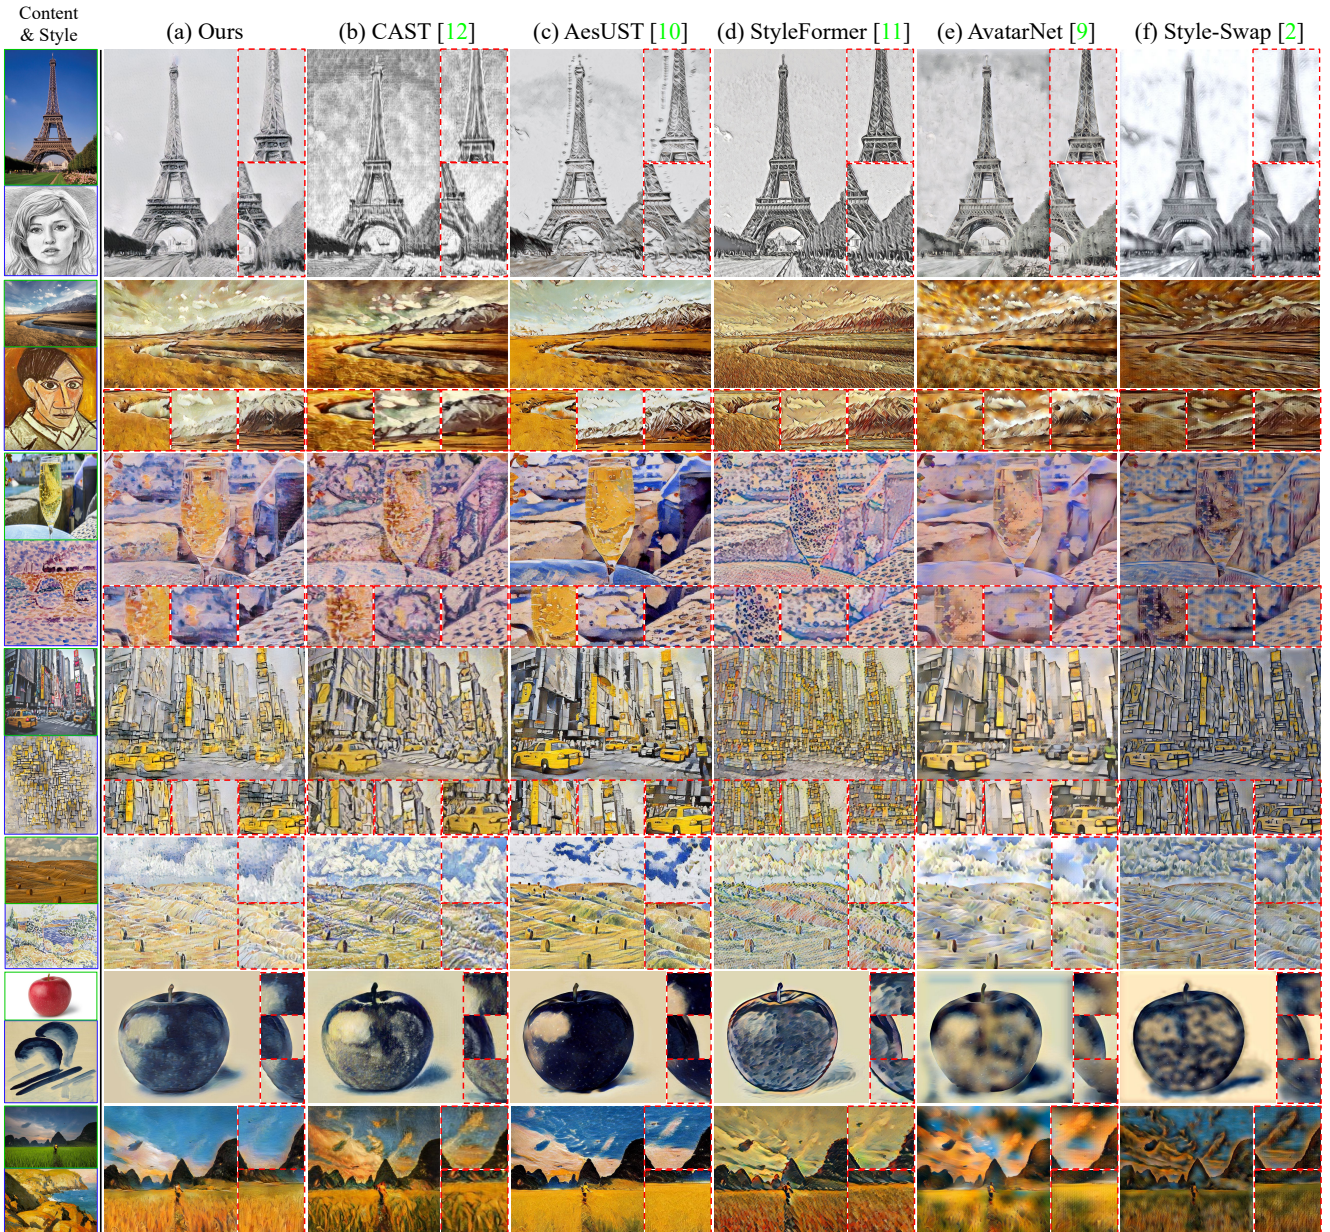

Figure 3. Qualitative comparisons with other recent AST methods [12, 10, 11] and patch-swapping based methods [9, ?].

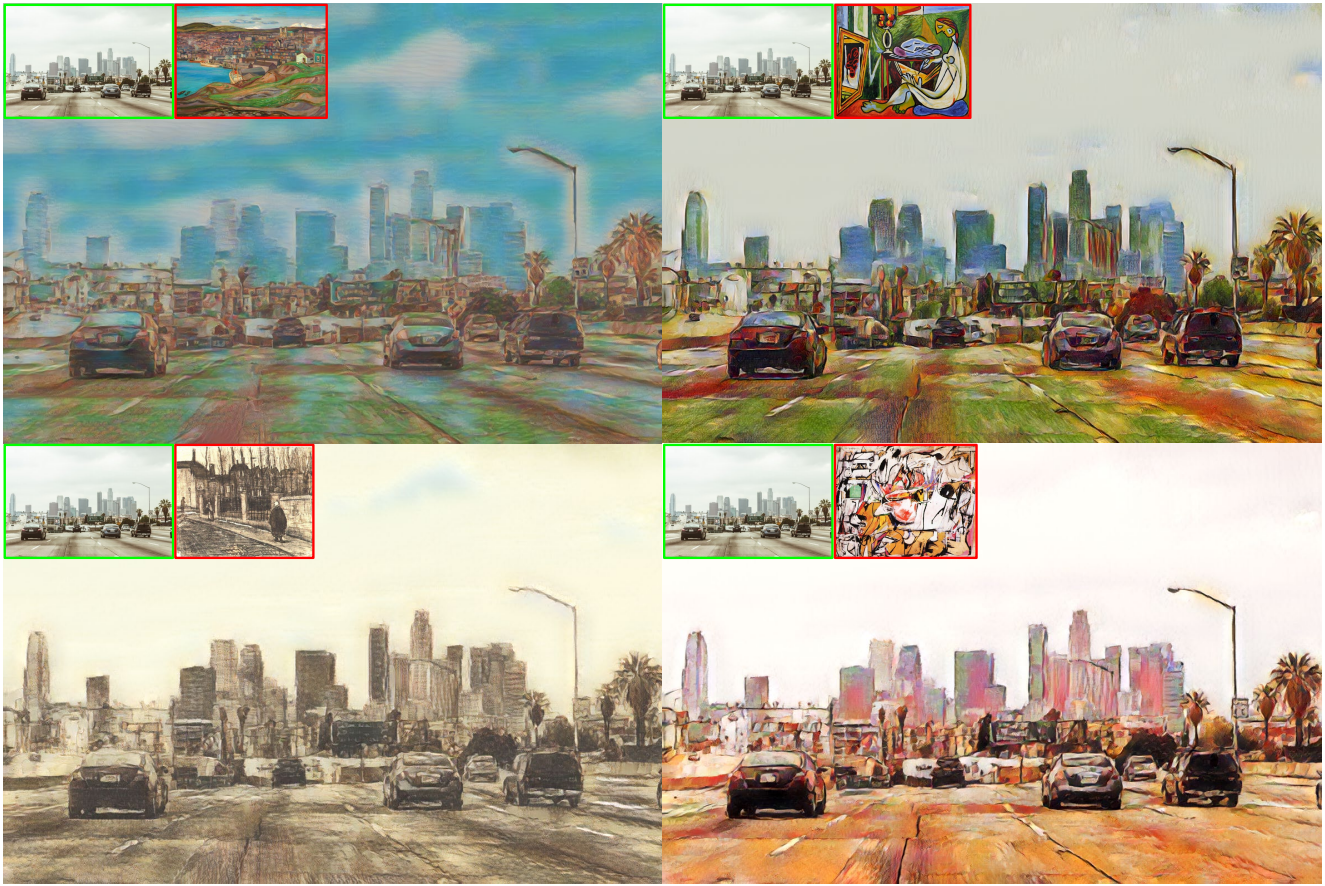

Figure 4. Qualitative results with high resolution (4752×3168). The red box indicates the artistic reference images, and the green box depicts the input content images.

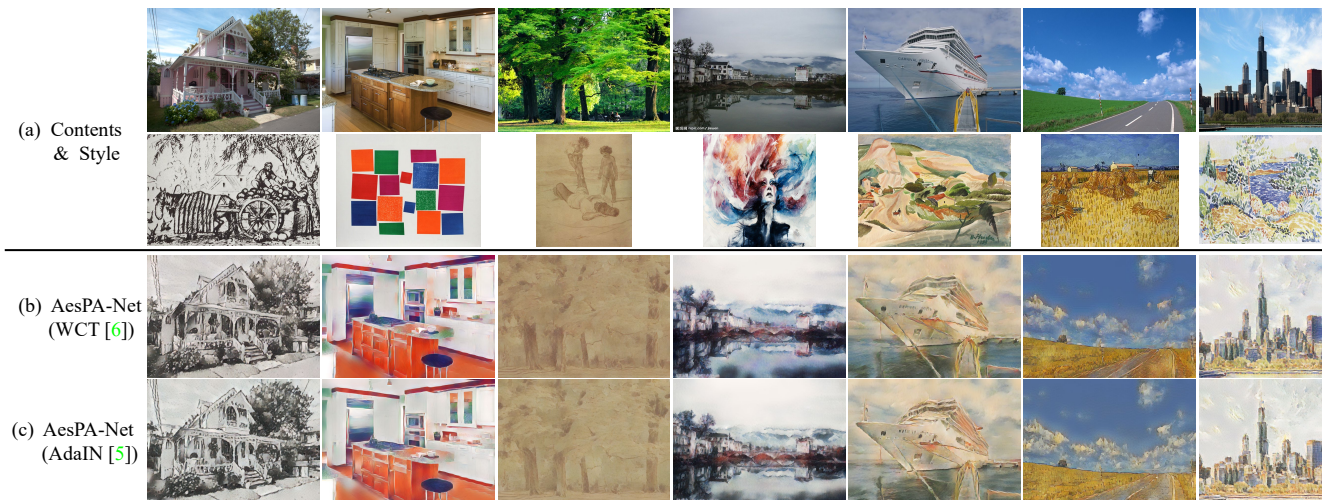

Figure 5. Qualitative results with the other global statistic-based transformation *i.e.*, AdaIN[5].

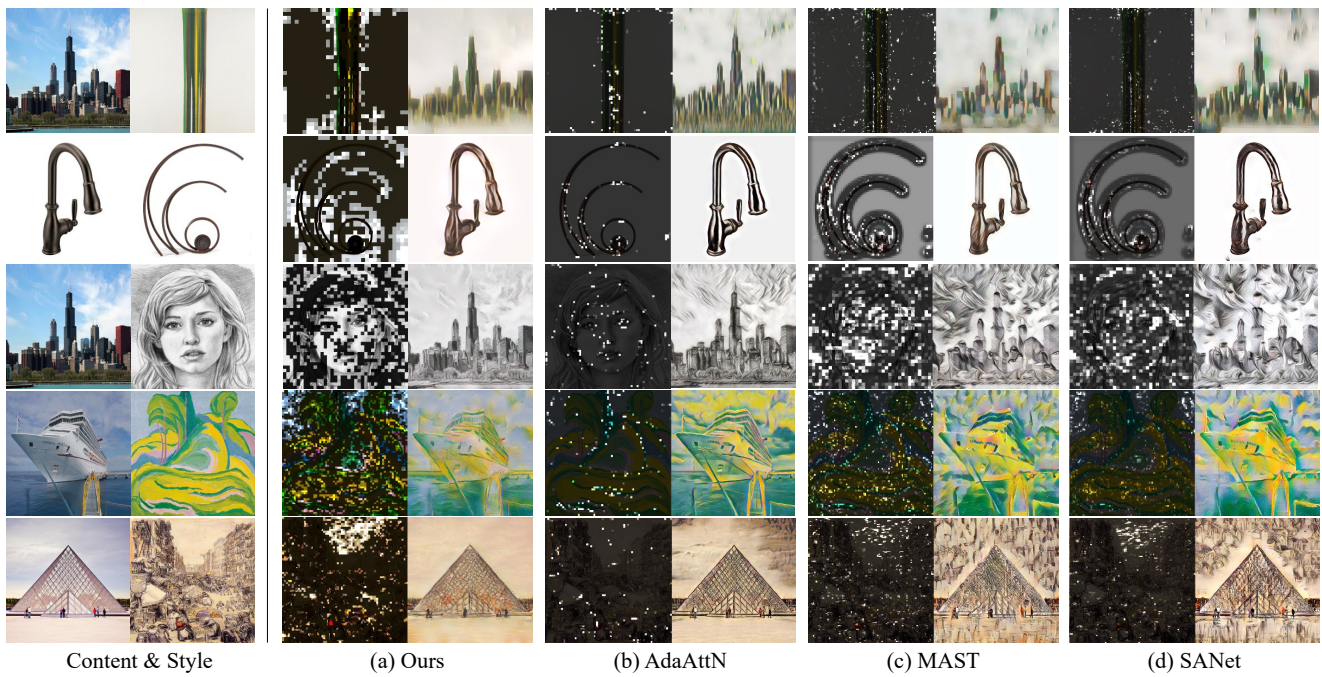

Figure 6. Visualization of attended region and stylized results given a pair of content and style images.

## References

- [1] Haibo Chen, Lei Zhao, Zhizhong Wang, Huiming Zhang, Zhiwen Zuo, Ailin Li, and Wei Xing. Artistic style transfer with internal-external learning and contrastive learning. In *NeurIPS*, 2021. 1
- [2] Tian Qi Chen and Mark Schmidt. Fast patch-based style transfer of arbitrary style. In *Workshop in Constructive Machine Learning, NIPS*, 2016. 1
- [3] Yingying Deng, Fan Tang, Weiming Dong, Chongyang Ma, Xingjia Pan, Lei Wang, and Changsheng Xu. Stytr2: Image style transfer with transformers. In *CVPR*, pages 11326–11336, 2022. 1
- [4] Yingying Deng, Fan Tang, Weiming Dong, Wen-Cheng Sun, Feiyue Huang, and Changsheng Xu. Arbitrary style transfer via multi-adaptation network. In *ACM Multimedia*, pages 2719–2727, 2020. 1
- [5] Xun Huang and Serge Belongie. Arbitrary style transfer in real-time with adaptive instance normalization. In *ICCV*, pages 1501–1510, 2017. 1, 4
- [6] Yijun Li, Chen Fang, Jimei Yang, Zhaowen Wang, Xin Lu, and Ming-Hsuan Yang. Universal style transfer via feature transforms. In *NeurIPS*, pages 386–396, 2017. 1
- [7] Songhua Liu, Tianwei Lin, Dongliang He, Fu Li, Meiling Wang, Xin Li, Zhengxing Sun, Qian Li, and Errui Ding. Adaattn: Revisit attention mechanism in arbitrary neural style transfer. In *ICCV*, pages 6629–6638, 2021. 1
- [8] Dae Young Park and Kwang Hee Lee. Arbitrary style transfer with style-attentional networks. In *CVPR*, pages 5880–5888, 2019. 1
- [9] Lu Sheng, Ziyi Lin, Jing Shao, and Xiaogang Wang. Avatar-net: Multi-scale zero-shot style transfer by feature decoration. In *CVPR*, pages 8242–8250, 2018. 1, 3
- [10] Zhizhong Wang, Zhanjie Zhang, Lei Zhao, Zhiwen Zuo, Ailin Li, Wei Xing, and Dongming Lu. Aesust: Towards aesthetic-enhanced universal style transfer. In *ACM Multimedia*, 2022. 1, 3
- [11] Xiaolei Wu, Zhihao Hu, Lu Sheng, and Dong Xu. Style-former: Real-time arbitrary style transfer via parametric style composition. In *Proceedings of the IEEE/CVF International Conference on Computer Vision*, pages 14618–14627, 2021. 1, 3
- [12] Yu xin Zhang, Fan Tang, Weiming Dong, Haibin Huang, Chongyang Ma, Tong-Yee Lee, and Changsheng Xu. Domain enhanced arbitrary image style transfer via contrastive learning. In *ACM SIGGRAPH*, pages 1–8, 2022. 1, 3
